# Supplementary material for: Impact of geographical cohorting, multidisciplinary rounding and incremental case management support on hospital length of stay and readmission rates: a propensity weighted analysis
Source: PubMed Central journal article supplement — BMJ Open Qual. 2024 May 23;13(2):e002737. doi: 10.1136/bmjoq-2023-002737 (PMC11116874; doi:10.1136/bmjoq-2023-002737), 2024-05-23
Supplement: bmjoq-2023-002737supp001.pdf [file bmjoq-2023-002737supp001.pdf]

**Supplemental Table 1.** Logistic regressions predicting discharge from 4300 unit during intervention

| Variable                                                                              | Odds of being discharge from 4300 unit vs. |                                |
|---------------------------------------------------------------------------------------|--------------------------------------------|--------------------------------|
|                                                                                       | Concurrent Control<br>(n=1224)             | Historical Control<br>(n=1088) |
|                                                                                       | Odds Ratio (95% CI)                        | Odds Ratio (95% CI)            |
| Constant                                                                              | 1.24 (0.53,2.89)                           | 1.32 (0.54,3.26)               |
| Age at discharge (years)                                                              | 1.00 (0.99,1.00)                           | 1.00 (0.99,1.01)               |
| Gender                                                                                |                                            |                                |
| Female                                                                                | (ref)                                      | (ref)                          |
| Male                                                                                  | 1.05 (0.83,1.33)                           | 0.99 (0.77,1.28)               |
| Race <sup>1</sup>                                                                     |                                            |                                |
| Black                                                                                 | (ref)                                      | (ref)                          |
| White                                                                                 | 1.51 (1.16,1.95)                           | 1.25 (0.95,1.66)               |
| American Indian/Alaska Native,<br>Asian/Pacific Islander, 2 or more races<br>or other | 1.21 (0.67,2.17)                           | 1.73 (0.87,3.41)               |
| Refused/Not reported                                                                  | 1.10 (0.38,3.20)                           | 0.49 (0.18,1.33)               |
| Ethnicity <sup>2</sup>                                                                |                                            |                                |
| Hispanic                                                                              | (ref)                                      | (ref)                          |
| Non-Hispanic                                                                          | 1.08 (0.52,2.27)                           | 1.72 (0.80,3.68)               |
| Refused/Not reported                                                                  | 1.30 (0.47,3.64)                           | 1.72 (0.60,4.95)               |
| Insurance                                                                             |                                            |                                |
| Private/Other                                                                         | (ref)                                      | (ref)                          |
| Public                                                                                | 1.08 (0.79,1.46)                           | 0.83 (0.59,1.17)               |
| Self-Pay                                                                              | 0.67 (0.41,1.08)                           | 0.80 (0.46,1.39)               |
| MSDRG Weight                                                                          | 0.89 (0.82,0.96)                           | 0.88 (0.81,0.97)               |
| Time spent in ICU (hours)                                                             |                                            |                                |
| No ICU                                                                                | (ref)                                      | (ref)                          |
| <24 hours                                                                             | 4.01 (1.73,9.26)                           | 2.12 (0.98,4.60)               |
| 24-72 hours                                                                           | 4.09 (2.48,6.74)                           | 2.14 (1.36,3.38)               |
| >72 hours                                                                             | 2.52 (1.60,3.96)                           | 1.94 (1.20,3.14)               |
| Duke Primary Care Active Patient                                                      |                                            |                                |
| No                                                                                    | (ref)                                      | (ref)                          |
| Yes                                                                                   | 0.90 (0.69,1.19)                           | 0.87 (0.65,1.17)               |

<sup>1</sup>Race is a mix of self-report and health care worker perceived race recorded in electronic medical records.

<sup>2</sup>Ethnicity is predominantly self-reported in electronic medical records.

**Supplemental Figure 1.** Comparison of predicted probability of being discharged from the 4300 unit during the intervention period by actual intervention/control status, by control type

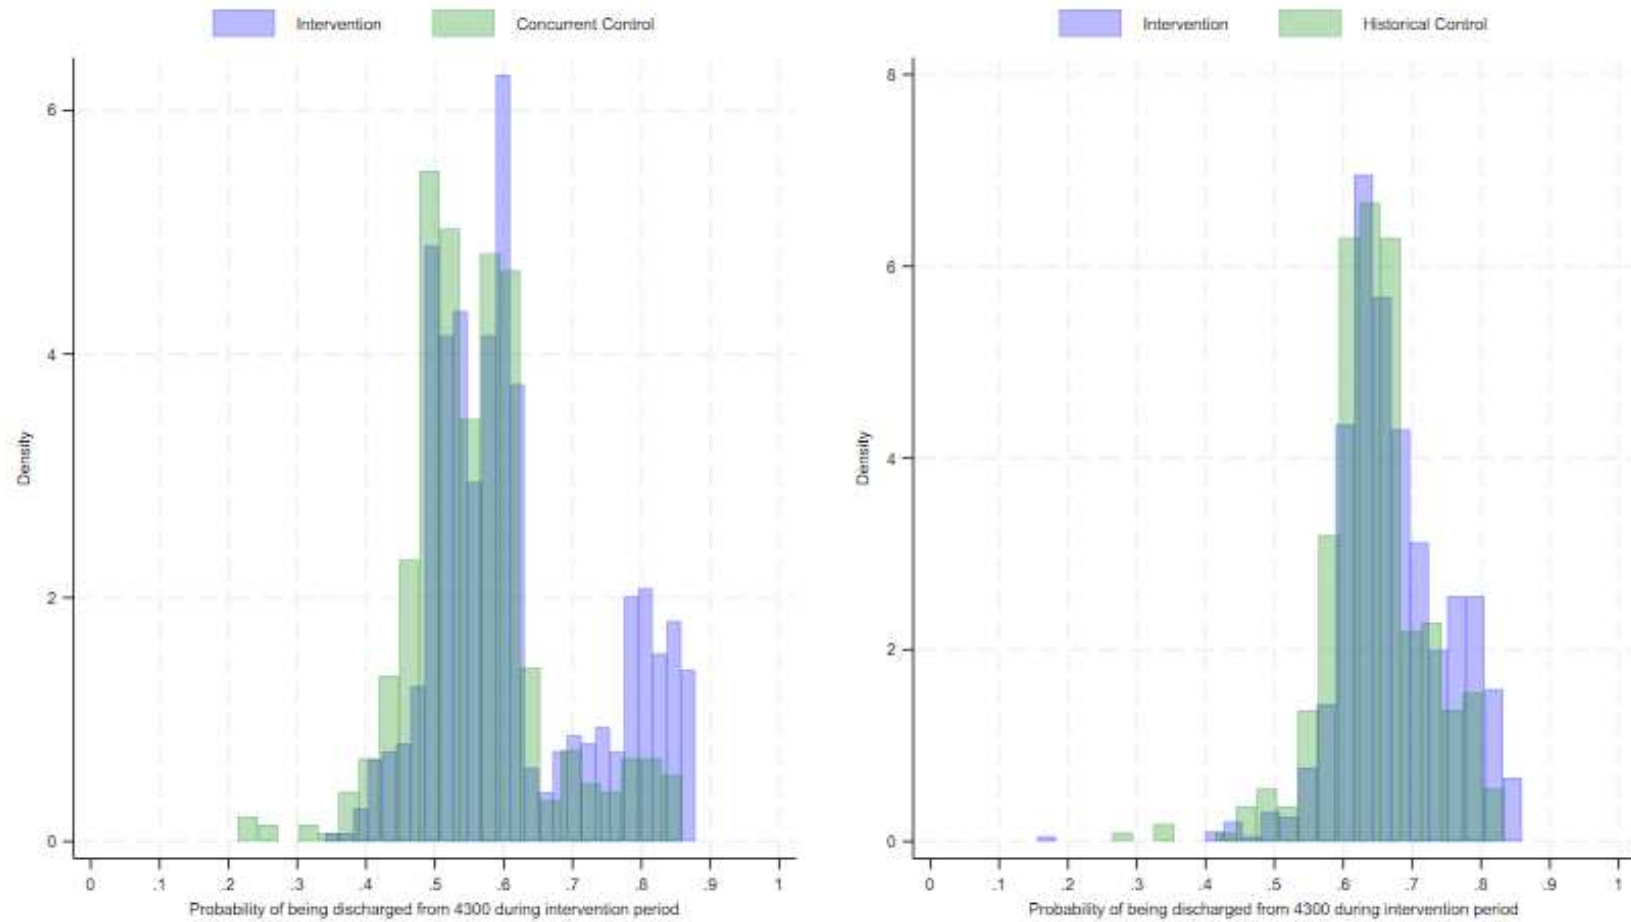

**Supplemental Figure 2.** Balance of baseline and subsequent characteristics between intervention and control conditions before and after applying overlap weights

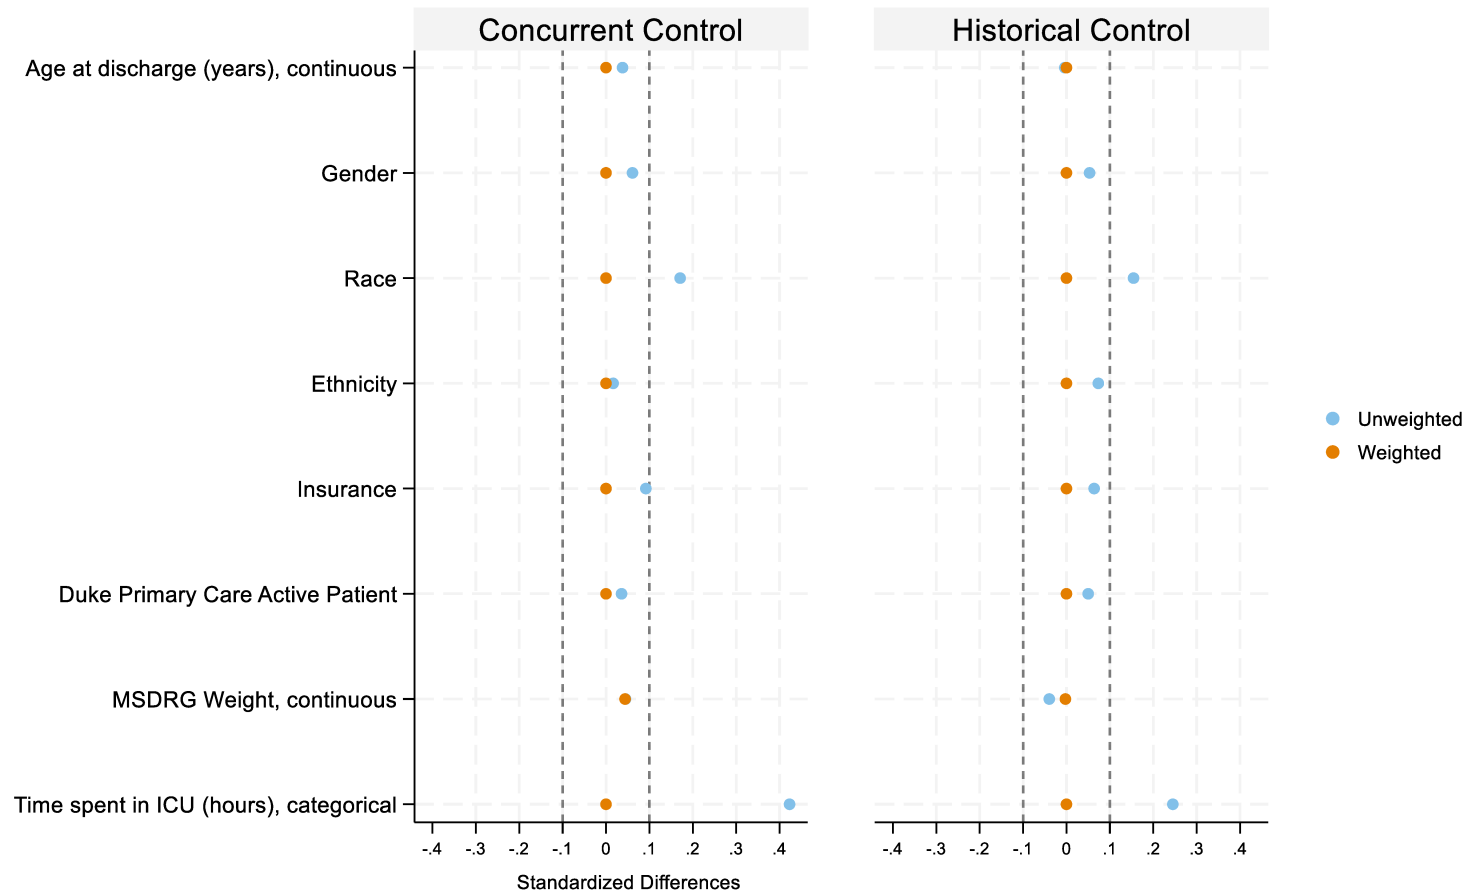

**Supplemental Figure 3** Weighted and unweighted Kaplan Meier plots illustrating time to death (up to 30 days), post discharge by treatment arm and control type

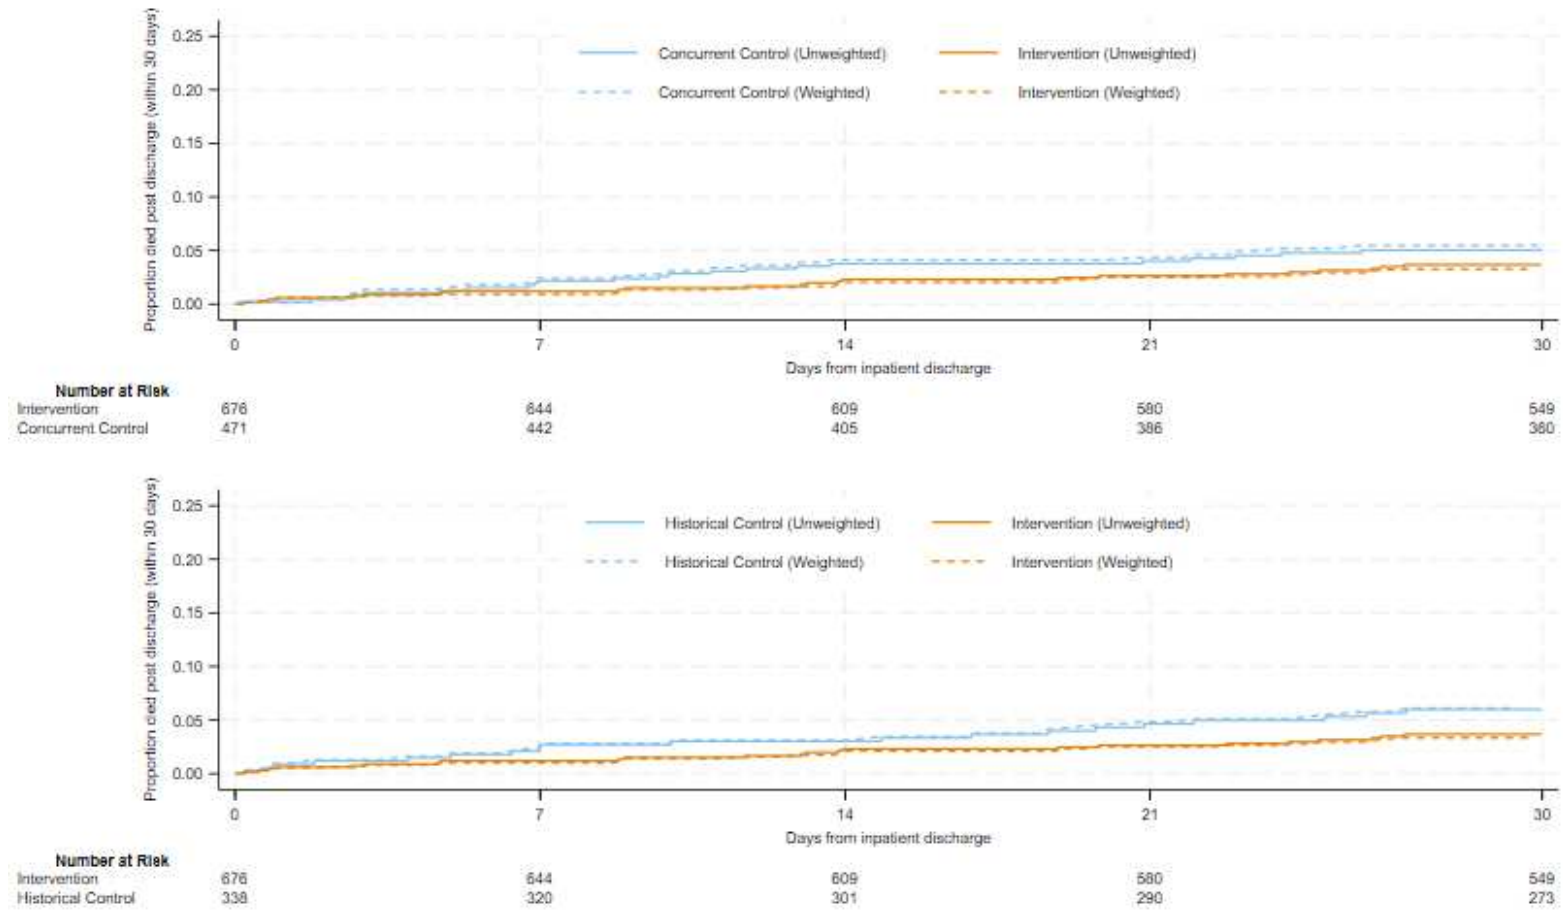

**Supplemental Table 2.** Unweighted mean outcomes and regression estimates<sup>1</sup> with 95% confidence intervals, by control type

| Outcome                                                           | Sample sizes corresponding to sample summaries by arm |                    |              | Sample Summaries by Arm      |                              |                              | Regression Estimates      |                           |
|-------------------------------------------------------------------|-------------------------------------------------------|--------------------|--------------|------------------------------|------------------------------|------------------------------|---------------------------|---------------------------|
|                                                                   | Historical Control                                    | Concurrent Control | Intervention | Historical Control           | Concurrent Control           | Intervention                 | Historical Control        | Concurrent Control        |
| <b>Primary outcomes</b>                                           |                                                       |                    |              |                              |                              |                              |                           |                           |
| <b>Length of stay (days)<sup>2,4</sup></b>                        | 361                                                   | 494                | 715          |                              |                              |                              | Event time ratio (95% CI) | Event time ratio (95% CI) |
| Mean (SD)                                                         |                                                       |                    |              | 12.5 (23.2)                  | 10.8 (19.1)                  | 8.0 (10.3)                   | 0.84 (0.75,0.95)          | 0.89 (0.80,0.98)          |
| Median (IQR)                                                      |                                                       |                    |              | 5.7 (3.6,11.9)               | 5.6 (3.5,10.4)               | 4.9 (3.0,9.1)                |                           |                           |
| <b>Inpatient death (%)</b>                                        | 366                                                   | 502                | 723          | 1.4%                         | 1.6%                         | 1.1%                         |                           |                           |
| <b>Length of stay (days) (censor at 95th percentile)</b>          | 362                                                   | 496                | 716          |                              |                              |                              | Event time ratio (95% CI) | Event time ratio (95% CI) |
| Mean (SD)                                                         |                                                       |                    |              | 9.4 (8.8)                    | 8.7 (8.1)                    | 7.4 (6.7)                    | 0.85 (0.75,0.95)          | 0.89 (0.80,0.98)          |
| Median (IQR)                                                      |                                                       |                    |              | 5.7 (3.6,12.0)               | 5.6 (3.5,10.5)               | 4.9 (3.0,9.1)                |                           |                           |
| <b>Days to readmission (30-day endpoint)<sup>2,4</sup></b>        | 52                                                    | 93                 | 108          |                              |                              |                              | Hazard ratio (95% CI)     | Hazard ratio (95% CI)     |
| Mean (SD)                                                         |                                                       |                    |              | 15.2 (8.7)                   | 14.7 (8.3)                   | 14.4 (8.1)                   | 1.03 (0.74,1.49)          | 0.78 (0.59,1.04)          |
| Median (IQR)                                                      |                                                       |                    |              | 12.5 (8.3,22.7)              | 13.0 (8.7,21.8)              | 14.2 (7.5,21.3)              |                           |                           |
| <b>Readmitted within 30 days (%)</b>                              | 338                                                   | 471                | 676          | 15.4%                        | 19.7%                        | 16.0%                        |                           |                           |
| <b>Days to death (30-days) for patients in readmission cohort</b> | 21                                                    | 22                 | 23           |                              |                              |                              | Hazard ratio (95% CI)     | Hazard ratio (95% CI)     |
| Mean (SD)                                                         |                                                       |                    |              | 14.1 (10.5)                  | 10.6 (7.9)                   | 12.6 (9.5)                   | 0.55 (0.30,0.97)          | 0.71 (0.39,1.36)          |
| Median (IQR)                                                      |                                                       |                    |              | 14.8 (4.9,22.0)              | 9.2 (4.9,13.7)               | 13.0 (3.0,22.7)              |                           |                           |
| <b>Death prior to 30-day readmission (%)</b>                      | 338                                                   | 471                | 676          | 6.2%                         | 4.7%                         | 3.4%                         |                           |                           |
| <b>Secondary Outcomes</b>                                         |                                                       |                    |              |                              |                              |                              |                           |                           |
| <b>Estimated discharge date accurate (%)<sup>2</sup></b>          | 339                                                   | 460                | 680          | 57.2%                        | 62.2%                        | 61.3%                        | Risk Ratio (95% CI)       | Risk Ratio (95% CI)       |
| <b>Hours from last EDD update to discharge</b>                    | 339                                                   | 460                | 680          |                              |                              |                              | 1.07 (0.96,1.20)          | 0.99 (0.90,1.09)          |
| Mean (SD)                                                         |                                                       |                    |              | 35.7 (19.5)                  | 33.5 (15.2)                  | 34.3 (17.7)                  |                           |                           |
| Median (IQR)                                                      |                                                       |                    |              | 28.7 (25.7,32.7)             | 28.4 (25.8,31.7)             | 27.9 (24.7,32.8)             |                           |                           |
| <b>Time of day of discharge<sup>2</sup></b>                       | 361                                                   | 494                | 715          |                              |                              |                              | Mean estimate (95% CI)    | Mean estimate (95% CI)    |
| Mean (SD <sup>3</sup> )                                           |                                                       |                    |              | 02:42 PM (2.7)               | 02:33 PM (2.5)               | 02:27 PM (2.8)               | -15.0 (-35.9,5.0)         | -5.8 (-24.7,12.5)         |
| Median (IQR)                                                      |                                                       |                    |              | 02:50 PM (12:43 PM,04:34 PM) | 02:29 PM (12:38 PM,04:23 PM) | 02:18 PM (12:11 PM,04:26 PM) |                           |                           |

<sup>1</sup>Event time ratios estimated with accelerated failure time models (loglogistic distribution), hazard ratios with Cox proportional hazards models, risk ratios with binomial models (log link), and mean estimates with linear regression. All 95% confidence intervals calculated using percentile intervals generated using cluster bootstrapping

<sup>2</sup>Outcomes prespecified as main outcomes of interest, all others meant to provide additional information and/or context

<sup>3</sup>Standard deviation of sample mean in minutes

<sup>4</sup>Sample sizes correspond to means which are conditional on having the event of interest. For LOS, this means the mean/median are calculated only for those discharged alive; for days to readmission, sample summaries are condition on having a readmission within 30 days. Regressions, however, make use of the full sample population.
